# Supplementary material for: Two-photon fluorescent probe for hypoxic cancer stem cells by responding to endogenous nitroreductase
Source: Royal Society of Chemistry journal article supplement (doi:10.1039/c8ay02638f), 2018-12-17
Supplement: c8ay02638f1.pdf [file c8ay02638f1.pdf]

## Supporting information

### Two-photon fluorescent probe for hypoxic cancer stem cell by responding to the endogenous nitroreductase

Yajing Liu<sup>1, 2#</sup>, Weixiao Yan<sup>1, 2#</sup>, Hongjuan Li<sup>1, 2</sup>, Haotong Peng<sup>1, 2</sup>, Xiaomin Suo<sup>1, 2</sup>, Zhenhua Li<sup>1, 2</sup>,  
Huifang Liu<sup>1, 2</sup>, Jinchao Zhang<sup>1, 2</sup>, Shuxiang Wang<sup>1, 2\*</sup>, Dandan Liu<sup>1, 2\*</sup>

1 Key Laboratory of Medicinal Chemistry and Molecular Diagnosis of the Ministry of Education,  
Hebei University, Baoding 071002, People's Republic of China

2 College of Chemistry and Environmental Science, Chemical Biology Key Laboratory of Hebei  
Province, Hebei University, Baoding 071002, People's Republic of China

\* Corresponding authors: Dandan Liu, Shuxiang Wang, and Jinchao Zhang

\* Address correspondence to leo-liudan@163.com, wsx@hub.edu.cn, and jc Zhang6970@163.com

# These authors contributed equally to this work.

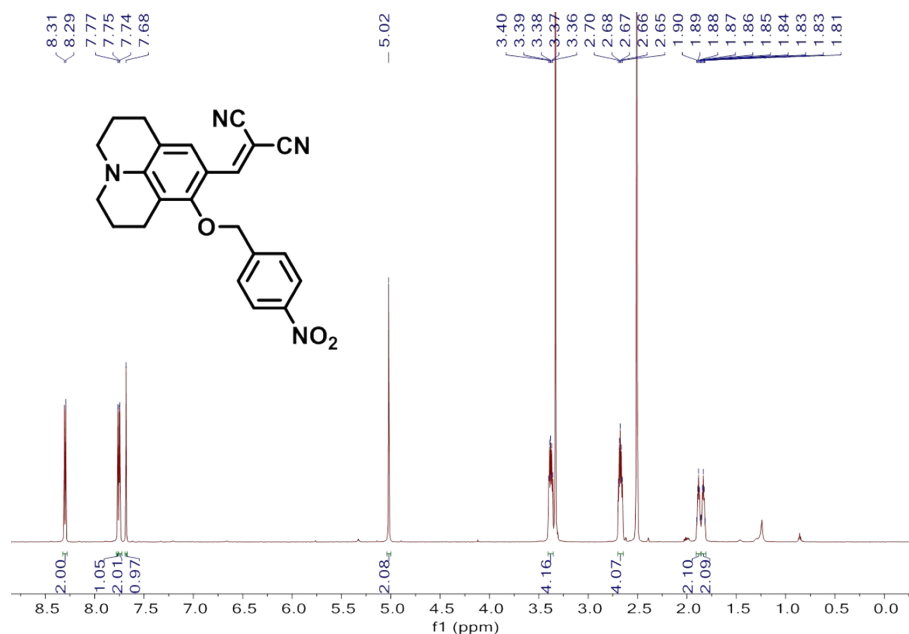

**Figure S1** <sup>1</sup>H NMR of 2-((4-nitrobenzyloxy)(2,3,6,7-tetrahydro-1H,5H-pyrido[3,2,1-ij]quinolin-9-yl)methylene)malononitrile

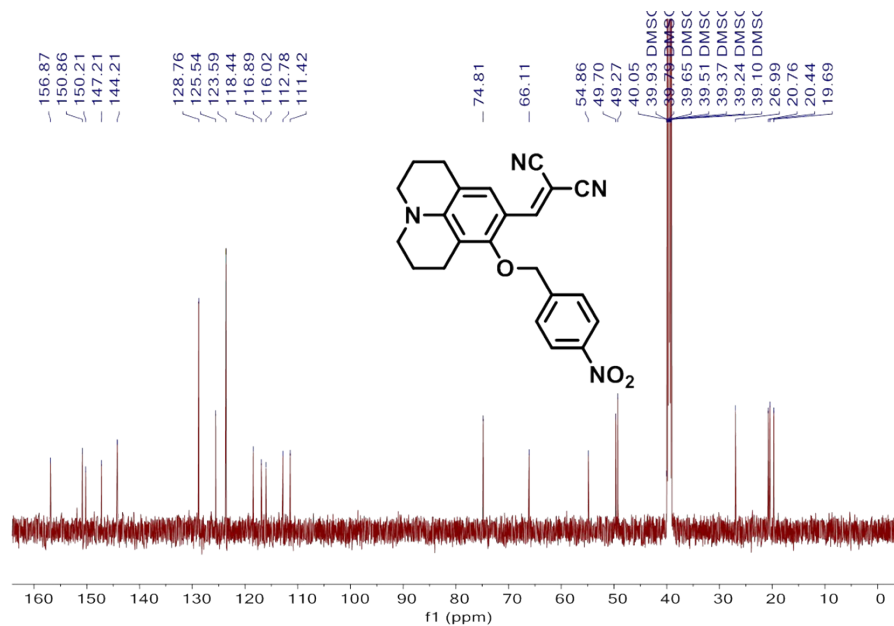

**Figure S2**  $^{13}\text{C}$  NMR of 2-((4-nitrobenzyloxy)(2,3,6,7-tetrahydro-1H,5H-pyrido[3,2,1-ij]quinolin-9-yl)methylene)malononitrile

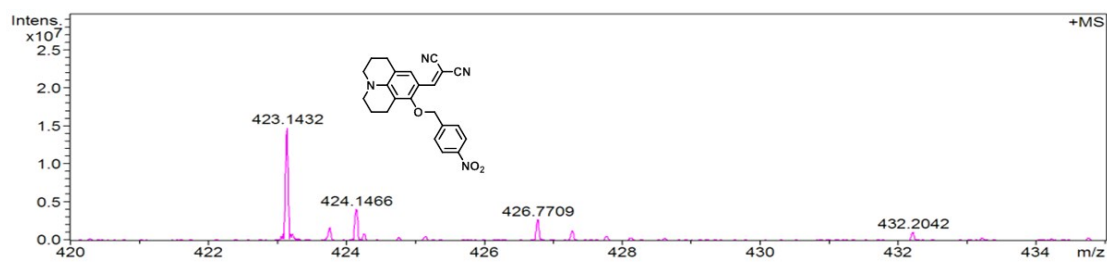

**Figure S3.** MS of 2-((4-nitrobenzyloxy)(2,3,6,7-tetrahydro-1H,5H-pyrido[3,2,1-ij]quinolin-9-yl)methylene)malononitrile

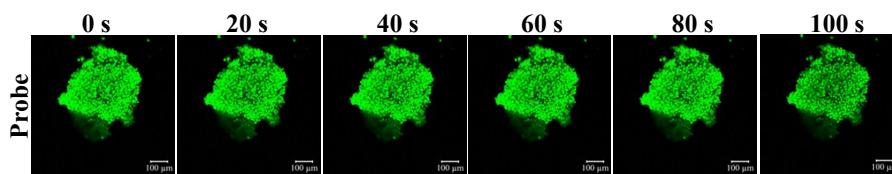

**Figure S4.** *In vitro* confocal fluorescence images of hypoxia in MGC-803 MCs with the probe under continuous light excitation. The image was captured every 20 seconds.
